# Supplementary material for: The unspoken reality of gender bias in surgery: A qualitative systematic review
Source: PubMed Central journal article supplement (PMC7853521; doi:10.1371/journal.pone.0246420), 2021-02-02
Supplement: pone.0246420.s003.pdf [file pone.0246420.s003.pdf]

## Supplementary File 2: CASP Qualitative Checklist

| <b>Paper</b>         | <b>1. Was there a clear statement of the aims of the research?</b> | <b>2. Is a qualitative methodology appropriate?</b> | <b>3. Was the research design appropriate to address the aims of the research?</b> | <b>4. Was the recruitment strategy appropriate to the aims of the research?</b> | <b>5. Was the data collected in a way that addressed the research issue?</b> | <b>6. Has the relationship between researcher and participants been adequately considered?</b> | <b>7. Have ethical issues been taken into consideration?</b> | <b>8. Was the data analysis sufficiently rigorous?</b> | <b>9. Is there a clear statement of findings?</b> | <b>Overall assessment*</b> |
|----------------------|--------------------------------------------------------------------|-----------------------------------------------------|------------------------------------------------------------------------------------|---------------------------------------------------------------------------------|------------------------------------------------------------------------------|------------------------------------------------------------------------------------------------|--------------------------------------------------------------|--------------------------------------------------------|---------------------------------------------------|----------------------------|
| Hinze et al, 2004    | Yes                                                                | Yes                                                 | Yes                                                                                | Yes                                                                             | Yes                                                                          | No                                                                                             | Yes                                                          | Cannot tell                                            | Yes                                               | Minor concerns             |
| Ozbilgin et al, 2011 | Yes                                                                | Yes                                                 | Yes                                                                                | Yes                                                                             | Yes                                                                          | Yes                                                                                            | Yes                                                          | Yes                                                    | Yes                                               | No/very minor concerns     |
| Brown et al, 2013    | Yes                                                                | Yes                                                 | Yes                                                                                | Yes                                                                             | Yes                                                                          | Yes                                                                                            | Yes                                                          | Yes                                                    | Yes                                               | No/very minor concerns     |
| Hill et al, 2015     | Yes                                                                | Yes                                                 | Yes                                                                                | Yes                                                                             | Yes                                                                          | Yes                                                                                            | Yes                                                          | Yes                                                    | Yes                                               | No/very minor concerns     |
| Rich et al, 2016     | Yes                                                                | Yes                                                 | Yes                                                                                | Yes                                                                             | Yes                                                                          | Yes                                                                                            | Yes                                                          | Yes                                                    | Yes                                               | No/very minor concerns     |
| Webster et al, 2016  | Yes                                                                | Yes                                                 | Yes                                                                                | Yes                                                                             | Yes                                                                          | Yes                                                                                            | Yes                                                          | Yes                                                    | Yes                                               | No/very minor concerns     |
| Dahlke et al, 2018   | Yes                                                                | Yes                                                 | Yes                                                                                | Yes                                                                             | Yes                                                                          | No                                                                                             | No                                                           | Yes                                                    | Yes                                               | Moderate considerations    |

|                       |     |     |     |     |     |     |     |     |     |     |                        |
|-----------------------|-----|-----|-----|-----|-----|-----|-----|-----|-----|-----|------------------------|
| Myers et al, 2018     | Yes | Yes | Yes | Yes | Yes | Yes | Yes | Yes | Yes | Yes | No/very minor concerns |
| Yi et al, 2018        | Yes | Yes | Yes | Yes | Yes | Yes | Yes | Yes | Yes | Yes | No/very minor concerns |
| Barnes et al, 2019    | Yes | Yes | Yes | Yes | Yes | Yes | Yes | Yes | Yes | Yes | No/very minor concerns |
| Bernardi et al, 2019  | Yes | Yes | Yes | Yes | Yes | No  | Yes | Yes | Yes | Yes | Minor concerns         |
| Liang et al, 2019     | Yes | Yes | Yes | Yes | Yes | Yes | Yes | Yes | Yes | Yes | No/very minor concerns |
| Lu et al, 2019        | Yes | Yes | Yes | Yes | Yes | Yes | Yes | Yes | Yes | Yes | No/very minor concerns |
| Hutchison et al, 2020 | Yes | Yes | Yes | Yes | Yes | Yes | Yes | Yes | Yes | Yes | No/very minor concerns |

\*The overall assessment was rated on a scale: 'no/very minor concerns', 'minor concerns', 'moderate considerations', and 'serious concerns'
