# Supplementary material for: The unspoken reality of gender bias in surgery: A qualitative systematic review
Source: PubMed Central journal article supplement (PMC7853521; doi:10.1371/journal.pone.0246420), 2021-02-02
Supplement: pone.0246420.s004.pdf [file pone.0246420.s004.pdf]

\*Represents standard was fulfilled

**S1 Title**

**S2 Abstract**

**S3 Problem formulation**

**S4 Purpose or research question**

**S5 Qualitative approach and research paradigm**

**S6 Researcher characteristics, reflexivity**

**S7 Context**

**S8 Sampling strategy**

**S9 Ethical issues pertaining to human subjects**

**S10 Data collection methods**

**S11 Data collection instruments/ technologies**

**S12 Units of study**

**S13 Data processing**

**S14 Data analysis**

**S15 Techniques to enhance trustworthiness**

**S16 Synthesis and interpretation**

**S17 Links to empirical data**

**S18 Integration with prior work, implications, transferability and contribution(s)**

**S19 Limitations**

**S20 Conflicts of interest**

**S21 Funding**
